# Supplementary material for: First-in-Human Trial of EphA2-Redirected CAR T-Cells in Patients With Recurrent Glioblastoma: A Preliminary Report of Three Cases at the Starting Dose
Source: Frontiers journal article supplement (doi:10.3389/fonc.2021.694941), 2021-06-21
Supplement: Data_Sheet_1.doc [file Data_Sheet_1.doc]

**Supplementary appendix**

First-in-human trial of EphA2-redirected CAR T-cells in patients with recurrent glioblastoma: a preliminary report of three cases at the starting dose

Qingtang Lin1*#, M.D., Ph.D., Teer Ba1*, M.D., Jinyuan Ho3*, Ph.D., Dandan Chen3, B.S., Ye Cheng1, M.D., Leiming Wang2, M.D., Geng Xu1, M.D., Lixin Xu1, M.D., Yiqiang Zhou1, M.D., Yukui Wei1, M.D., Jianqiang Li3#, Ph.D., Feng Ling1#, M.D., Ph.D.

1 Department of Neurosurgery, Xuanwu Hospital, Capital Medical University, Beijing, 100054, China

2 Department of Pathology, Xuanwu Hospital, Capital Medical University, Beijing, 100054, China

3 CAR-T Research Center, Hebei Senlang Biotechnology Co., Ltd., Shijiazhuang, China

* Equal first authorship;

# Correspondence should be addressed to Drs. Qingtang Lin ([linqingtang@xwhosp.org](mailto:linqingtang@xwhosp.org)), Jianqiang Li ([lijianqiang@senlangbio.com](mailto:lijianqiang@senlangbio.com)), and Feng Ling (ling-feng@163.com)

Materials and Methods

Figure 1 in vitro functional validation

Table 1 CAR T-cells manufacture characteristics

Table 2 Patient 1’s vital signs and laboratory investigations

Table 3 Patient 2’s vital signs and laboratory investigations

Table 4 Patient 3’s vital signs and laboratory investigations

**Materials and Methods**

**Lentiviral vector construction and virus production**

Sequences encoding human anti-EphA2 scFv1,2 were linked to a CD8 hinge and transmembrane region, a 4-1BB-derived co-stimulatory domain, and intracellular CD3ζ. The CAR gene was combined with a sequence encoding truncated epidermal growth factor receptor (tEGFR) by a T2A sequence and cloned into the lentiviral vector pLenti-CAR-EphA2. The human EphA2 gene sequence (NM_004431.5) was synthesized and then sub-cloned into a lentiviral vector with a puromycin cassette. The plasmid was named as pLenti-puro-EphA2. Lentiviruses were packaged by transient transfection of HEK293FT-cells using psPAX2, pMD2G, and pLenti-CAR-EphA2 or pLenti-puro-EphA2 with PEI. After 48 hour incubation, supernatants were further centrifuged for two hours at 20,000 g, and the pellet was suspended in TexMACS, aliquot, and stored at -80℃.

**Generation of CAR T-cells**

Primary human T-cells were activated, transduced, enriched, and expanded as described3. In brief, PBMC were selected with CD3 microbeads (MiltenyiBiotec: 130-050-101) and then activated with CTS CD3/CD28 Dynabeads (Gibco: 40203D). T cells were cultured in 200 IU IL-2 supplemented TexMACS (MiltenyiBiotec, 170-076-309) for two days. T cells were then transduced with EphA2-CAR in the presence of 8 ng/ml of protamine sulfate. The transduction rate of CAR T-cells was determined by flow cytometry on day 5, three days after transduction. CAR T-cells were continually expanded in TexMACS with 200 IU IL-2 until day 14.

**In vitro functional assays of EphA2-redirected CAR T-cells**

Cytotoxicity was analyzed by a 4-hour Calcein-AM (Invitrogen, C3099) release assay. Target cells were stained with 1 mg/ml of Calcein-AM for 30 minutes, then washed twice with DPBS. 1×105 target cells were incubated with 1×104, 3×104, or 1×105 CAR-T cells in the presence of 200 μl of RPMI with 10% FBS (Exccell Bio, China: FND500) in a 96-well plate. Four hours later, the supernatants were collected for the detection of released Calcein-AM on Multiskan Sky with Ex/Em at 490 nm and 515 nm. The percentage of specific lysis was calculated as 100% × (fluorescence of target+CART – fluorescence of target alone)/(max fluorescence of target – fluorescence of target alone). Cytokine concentrations were determined by BiolegendLEGENDplexTM Human inflammation Panel (13-plex, Cat.No.740118), as previously described.1 The results of the specificity of cell killing and cytokine production were provided in the supplementary appendix (figure 1A&B)

**Immunohistochemistry Staining**

Immunohistochemistry (IHC) was performed on 4 µm formalin-fixed, paraffin-embedded tissue sections. The utilized primary antibodies were anti-EphA2 (Abcam, ab55275; 1:1000 dilution). Negative control with the omission of the primary antibody was also included. All staining was performed using Leica Bond automated staining processors.

**Flow cytometry**

Peripheral blood samples were collected before and post CAR T-cell infusion. PBMCs were isolated by Ficoll-Paque media (GE) and density gradient centrifugation. PBMC can be used for flow cytometry staining immediately; for the long term storage, PBMC were frozen at concentrations of 1×107 cells/ml at -80℃, and then transferred to liquid nitrogen. Cerebral spinal fluid (CSF) was collected in a volume of 6-8 ml by lumbar puncture. To isolate lymphocytes, CSF was diluted into 1/3 with PBS and centrifuged at 2500rpm, 4°C, for 5 mins, and then the cell pellet was re-suspended in FACS buffer.

For FACS staining, cells were first treated with FcR blocking reagent (Miltenyi) for 15 mins and then stained with fluorescence conjugated flow antibody. The following antibodies and reagents were used for staining: anti-CD3 (OKT3), anti-CD4(OKT4), anti-CD8(SK1), anti-EGFR(AY13), anti-CD45(2D1) and isotypes (Biolegend), 7-AAD(BD). As mentioned previously, a truncated EGFR (tEGFR) is incorporated into the CAR vector; therefore CAR T-cells could be identified as tEGFR+CD3+ by flow cytometry. Samples were run on a FACS Caliber (BD Biosciences) and the data were analyzed via the software FlowJo V10.

**Real-time PCR assay**

After the infusion of EphA2-redirected CAR T-cells, the genomic DNA was extracted from the PB with QIAamp DNA Blood Mini Kit (Qiagen). A standard curve was established by serial dilution of the plasmid encoding the transgene. The targeted gene was amplified with WPRE specific primers and probe and normalized with CDKN1a. The amplification was performed by CFX Connect (Bio-Rad).

**Imaging analysis**

Multiple sequences of MRI scanning including T1, T2, fluid-attenuated inversion recovery (FLAIR), and post-gadolinium T1-weighted were performed on a Siemens spectra 3.0 Tesla scanner.

**REFERENCE**

1. Damschroder MM, Widjaja L, Gill PS, et al. Framework shuffling of antibodies to reduce immunogenicity and manipulate functional and biophysical properties. Mol Immunol 2007; 44: 3049–60.
2. Coffman KT, Hu M, Carles-Kinch K, et al. Differential EphA2 epitope display on normal versus malignant cells. Cancer Res 2003;63: 7907–12.
3. Ma F, Ho J, Du H, et al., Evidence of long-lasting anti-CD19 activity of engrafted CD19 chimeric antigen receptor–modified T cells in a phase I study targeting pediatrics with acute lymphoblastic leukemia. Hematological Oncology 2019; 37: 601-8.

**Figure1. In vitro study of anti-EphA2 CAR T-cells**. (A) Specific lytic activity of EphA2-redirected CAR T-cells or CD3+ T cells in designated E:T ratio at 0.1, 0.3, and 1 targeting EphA2-expressing K562 cells. (B) Production of IFN-gamma by EphA2-redirected CAR T-cells or CD3+T cells at designated E:T ratios.

**
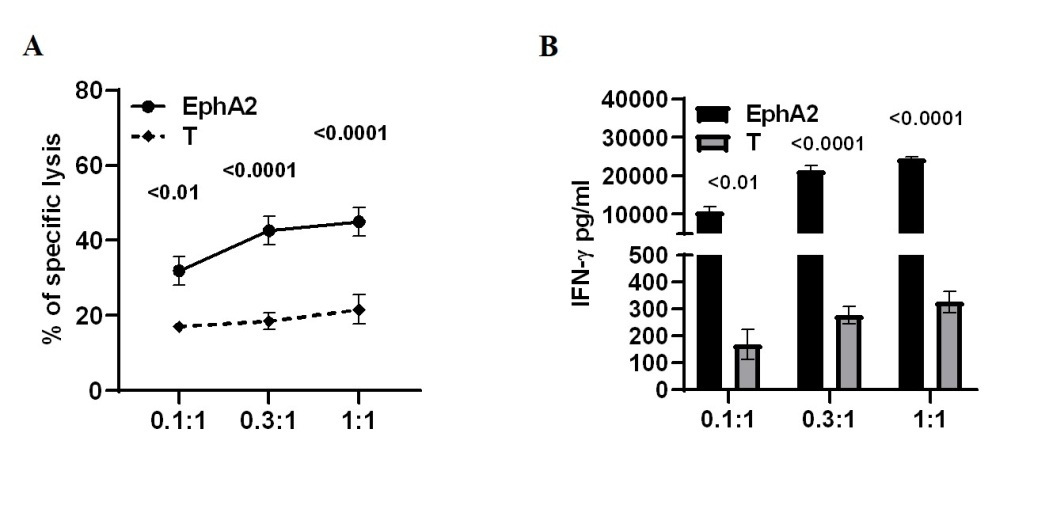
**

**Table 1. CAR T cells manufacture characteristics**

| Case | CAR T-cells (106/kg) | Transduction efficacy（%） | in vitro expansion times | CD4/CD8 | CD28+T percentage | CD62L+T percentage |
| --- | --- | --- | --- | --- | --- | --- |
| Patient 1 | 1 | 12.5 | 250 | 0.153 | 94.30% | 84% |
| Patient 2 | 1 | 5 | 150 | 0.162 | 97.60% | 86.50% |
| Patient3 | 1 | 12.8 | 158 | 0.132 | 91.20% | 90.84% |

**Table 2.** Vital signs, laboratory investigations, and cytokines in patient 1

| Day | d0 | d4 | d7 | d10 | d14 | d21 | d28 | Unit | Normal range |
| --- | --- | --- | --- | --- | --- | --- | --- | --- | --- |
| WBC | NA | 1.11 | 0.16 | 0.9 | 5.45 | 4.17 | 5.41 | /L | 4-10x10^9 |
| NE# | NA | 1.05 | 0.1 | 0.76 | 4.78 | 2.6 | 2.96 | /L | 2-7.7x10^9 |
| LY# | NA | 0.02 | 0.04 | 0.04 | 0.32 | 1.24 | 1.96 | /L | 0.8-4x10^9 |
| HGB | NA | 114 | 102 | 84 | 83 | 91 | 96 | g/L | 110-150 |
| PLT | NA | 81 | 53 | 195 | 324 | 138 | 117 | /L | 100-300x10^9 |
| CRP | NA | 17 | >160 | >160 | 25 | 11 | 9 | mg/L | 0-9 |
| Tmax | NA | 38.4 | 39.5 | 38.6 | 36.7 | 37.8 | 37 | ℃ | 37 |
| SBP | NA | 108 | 105 | 140 | 135 | 110 | 120 | mmHg | 120 |
| DBP | NA | 77 | 72 | 92 | 79 | 64 | 86 | mmHg | 90 |
| RR | NA | 20 | 24 | 22 | 25 | 20 | 19 | Bpm | 16-20 |
| HR | NA | 100 | 102 | 118 | 74 | 85 | 78 | Bpm | 70-100 |
| ALT | 19.6 | 20.1 | 76.1 | 45.9 | 36.4 | 31.4 | 19.8 | U/L | 0-40 |
| AST | 11 | 13 | 55 | 35 | 32 | 24 | 21 | U/L | 0-40 |
| TBiL | 13 | 13.3 | 8.5 | 7.6 | 10.6 | 11.7 | 7.9 | umol/L | 2-20 |
| Crea | 48 | 33 | 33 | 34 | 35 | 33 | 21 | umol/L | 40-97 |
| Urea | 189 | 122 | 60 | 66 | 122 | 107 | 136 | mmol/L | 120-430 |
| Na | 134.9 | 132.3 | 134.7 | 133.2 | 137.2 | 137.1 | 135.6 | mmol/L | 135-145 |
| K | 3.87 | 3.73 | 3.7 | 3.63 | 3.82 | 3.94 | 3.82 | mmol/L | 3.5-5.5 |
| Cl | 96.4 | 95.6 | 100.1 | 99.2 | 96 | 95.8 | 92.9 | mmol/L | 96-108 |
| T.P. | 57.3 | 56.5 | 49.6 | 39.9 | 48.6 | 51 | 51.7 | g/L | 60-83 |
| Alb | 36.2 | 34.5 | 27.6 | 25.8 | 33.8 | 38.4 | 36 | g/L | 37-53 |
| INR | NA | NA | NA | NA | NA | NA | NA |  | 0.8-1.2 |
| APTT | NA | NA | NA | NA | NA | NA | NA | Sec | 25.1-38 |
| D-dimer | NA | NA | NA | NA | NA | NA | NA | mg/L | ＜0.23 |
| IL-1β | 5.25 | 3.33 | 10.41 | 4.23 | 1 | 8.64 | ND | pg/ml | ND-55.0 |
| IFN-α2 | 46.52 | 13.91 | 12.66 | 26.57 | 14.2 | 26.81 | ND | ND-177.4 |
| IFN-γ | 64.56 | 128.98 | 913.44 | 422.75 | 53.44 | 451.24 | 60.87 | ND-87.6 |
| TNF-α | 5.8 | 10.02 | 15.57 | 32.66 | ND | 41.34 | ND | ND-140.0 |
| MCP-1 | 607.71 | 456.63 | 730.32 | 1213.61 | 375.8 | 691.33 | 447.03 | 22.6-636.8 |
| IL-6 | 26.5 | 26.5 | 478.23 | 247.77 | ND | 30.16 | 61.17 | ND-65.4 |
| IL-8 | 53.15 | 44.76 | 238.86 | 425.83 | 57.38 | 78.04 | 65.68 | ND-104.0 |
| IL-10 | 4.82 | 3.13 | 12.52 | 16.7 | 3.82 | 15.6 | ND | ND-18.6 |
| IL-12P70 | 3.82 | 2.25 | 4.15 | ND | ND | ND | ND | ND-17.8 |
| IL-17A | 66.39 | 43.61 | 61.88 | ND | ND | ND | ND | ND-127.6 |
| IL-18 | 368.55 | 394.77 | 913.05 | 1020.78 | 726.68 | 1046.78 | 950.3 | 32-435.6 |
| IL-23 | 54.01 | 42.14 | 73.96 | ND | ND | 8.9 | ND | ND-188.2 |
| IL-33 | 17.32 | 13.66 | 21.09 | ND | ND | ND | ND | ND-294.3 |

**Table 3** Vital signs, laboratory investigations, and cytokines in patient 2

| day | d0 | d4 | d7 | d10 | d14 | d21 | d28 | Unit | Normal range |
| --- | --- | --- | --- | --- | --- | --- | --- | --- | --- |
| WBC | 4.27 | 4.53 | 1.02 | NA | 1.75 | 2.54 | 3.65 | /L | 4-10x10^9 |
| NE# | 2.97 | 3.67 | 0.49 | NA | 0.65 | 1.68 | 2.77 | /L | 2-7.7x10^9 |
| LY# | 0.74 | 0.11 | 0.17 | NA | 0.42 | 0.38 | 0.38 | /L | 0.8-4x10^9 |
| HGB | 125 | 137 | 109 | NA | 116 | 112 | 109 | g/L | 110-150 |
| PLT | 135 | 120 | 118 | NA | 103 | 87 | 58 | /L | 100-300x10^9 |
| CRP | NA | 26.64 | 2.54 | NA | 0.57 | 0.21 | 5.48 | mg/L | 0-9 |
| Tmax | NA | 37.7 | 36.7 | 36.8 | 37.7 | 36.8 | 37 | ℃ | 37 |
| SBP | NA | NA | NA | NA | NA | NA | NA | mmHg | 120 |
| DBP | NA | NA | NA | NA | NA | NA | NA | mmHg | 90 |
| RR | NA | 20 | 18 | 20 | 20 | 19 | 20 | Bpm | 16-20 |
| HR | NA | 82 | 62 | 78 | 86 | 86 | 76 | Bpm | 70-100 |
| ALT | 16 | 12 | 12 | NA | 12 | 14 | 14 | U/L | 0-40 |
| AST | 24 | 14 | 16 | NA | 16 | 17 | 20 | U/L | 0-40 |
| TBiL | 4.86 | 8 | 5.2 | NA | 4.5 | 4.8 | 5.6 | umol/L | 2-20 |
| Crea | 57 | 52.9 | 46.3 | NA | 54.7 | 58 | 57.4 | umol/L | 40-97 |
| Urea | 309 | 219 | 246 | NA | 285 | 247 | 220 | mmol/L | 120-430 |
| Na | 141 | 134 | 139.4 | NA | 141.6 | 141.5 | 142.6 | mmol/L | 135-145 |
| K | 3.75 | 3.97 | 3.88 | NA | 3.96 | 0.94 | 3.72 | mmol/L | 3.5-5.5 |
| Cl | 105 | 98.23 | 104.23 | NA | 104.3 | 104.2 | 105.7 | mmol/L | 96-108 |
| T.P. | 60.31 | 71.1 | 61.1 | NA | 59.3 | 59.5 | 58.8 | g/L | 60-83 |
| Alb | 35.22 | 41.4 | 35 | NA | 36.6 | 37.3 | 36.8 | g/L | 37-53 |
| INR | 1.06 | NA | NA | NA | 1.14 | NA | 1.1 |  | 0.8-1.2 |
| APTT | 40 | NA | NA | NA | 32.9 | NA | 33.4 | Sec | 25.1-38 |
| D-dimer | 0.64 | NA | NA | NA | 0.22 | NA | 0.15 | mg/L | ＜0.23 |
| IL-1β | 45.83 | 29.31 | 29.71 | NA | 31.52 | 65.92 | 49.91 | pg/ml | ND-55.0 |
| IFN-α2 | 9.09 | 12.13 | 13.19 | NA | 7.22 | 34.8 | 27.88 | ND-177.4 |
| IFN-γ | 535.97 | 397 | 325.99 | NA | 294.6 | 517.89 | 504.45 | ND-87.6 |
| TNF-α | 32.28 | 27.27 | 38.72 | NA | 36.06 | 58.29 | 42.22 | ND-140.0 |
| MCP-1 | 901.54 | 369.59 | 305.41 | NA | 342 | 487.42 | 412.77 | 22.6-636.8 |
| IL-6 | 64.36 | 36.98 | 29.56 | NA | 61.34 | 59.84 | 85.92 | ND-65.4 |
| IL-8 | 56.4 | 23.19 | 31.87 | NA | 82.68 | 64.69 | 125.18 | ND-104.0 |
| IL-10 | 23.26 | 10.17 | 13.14 | NA | 12.88 | 17.18 | 12.05 | ND-18.6 |
| IL-12P70 | 6.57 | 4.4 | 4.59 | NA | 4.52 | 7.53 | 5.3 | ND-17.8 |
| IL-17A | 74.29 | 94.32 | 85.92 | NA | 88 | 126.18 | 121.76 | ND-127.6 |
| IL-18 | 507.46 | 315.23 | 211.13 | NA | 279.3 | 661.42 | 451.78 | 32-435.6 |
| IL-23 | 137.95 | 78.06 | 58.51 | NA | 70.96 | 109.38 | 47.9 | ND-188.2 |
| IL-33 | 40.9 | 19.76 | ND | NA | 29.04 | 42.29 | 55.32 | ND-294.3 |

**Table 4.** Vital signs, laboratory investigations, and cytokines in patient 3

| day | d0 | d4 | d7 | d10 | d14 | d21 | d28 | Unit | Normal range |
| --- | --- | --- | --- | --- | --- | --- | --- | --- | --- |
| WBC | NA | NA | 0.71 | 0.65 | 2.4 | 3.04 | 4.68 | /L | 4-10x10^9 |
| NE# | NA | NA | 0.42 | 0.19 | 1.6 | 2.5 | 78 | /L | 2-7.7x10^9 |
| LY# | NA | NA | 0.13 | 0.2 | 0.27 | 0.2 | 0.28 | /L | 0.8-4x10^9 |
| HGB | NA | NA | 121 | 127 | 123 | 124 | 124 | g/L | 110-150 |
| PLT | NA | NA | 186 | 122 | 243 | 201 | 148 | /L | 100-300x10^9 |
| CRP | NA | NA | NA | 21.13 | 8.32 | 4.23 | 7.09 | mg/L | 0-9 |
| Tmax | 39.3 | 38.8 | 36.7 | 37.2 | 36.8 | 36.9 | 36.7 | ℃ | 37 |
| SBP | NA | NA | NA | NA | NA | NA | NA | mmHg | 120 |
| DBP | NA | NA | NA | NA | NA | NA | NA | mmHg | 90 |
| RR | NA | 20 | 19 | 20 | 19 | 18 | 18 | bpm | 16-20 |
| HR | NA | 84 | 86 | 88 | 72 | 92 | 72 | bpm | 70-100 |
| ALT | NA | NA | 25 | 30 | 24 | 15 | 12 | U/L | 0-40 |
| AST | NA | NA | 57 | 54 | 50 | 18 | 13 | U/L | 0-40 |
| TBiL | NA | NA | 6 | 5.8 | 6.2 | 8.1 | 8.4 | umol/L | 2-20 |
| Crea | NA | NA | 36 | 43.2 | 45.5 | 61.8 | 56.5 | umol/L | 40-97 |
| Urea | NA | NA | 127 | 177 | 256 | 299 | 270 | mmol/L | 120-430 |
| Na | NA | NA | 142.4 | 143.9 | 189.8 | 144.4 | 146.5 | mmol/L | 135-145 |
| K | NA | NA | 4.6 | 4.41 | 4.64 | 4.24 | 3.73 | mmol/L | 3.5-5.5 |
| Cl | NA | NA | 104.69 | 105.1 | 101.5 | 105.4 | 105.7 | mmol/L | 96-108 |
| T.P. | NA | NA | 57 | 60.5 | 60.8 | 61.5 | 66.7 | g/L | 60-83 |
| Alb | NA | NA | 34.1 | 36.4 | 36.5 | 37.1 | 40.6 | g/L | 37-53 |
| INR | NA | NA | 1.09 | NA | 1.03 | 1.1 | NA |  | 0.8-1.2 |
| APTT | NA | NA | 31.9 | NA | 29.6 | 42 | NA | sec | 25.1-38 |
| D-dimer | NA | NA | NA | NA | 0.36 | 0.36 | NA | mg/L | ＜0.23 |
| IL-1β | 14.09 | 11.19 | 16.96 | 6.7 | 17.72 | 8.16 | ND | pg/ml | ND-55.0 |
| IFN-α2 | 4.96 | 6.45 | 21.96 | 4.18 | 5.33 | 20.49 | ND | ND-177.4 |
| IFN-γ | 70.06 | 3899.48 | 1038.22 | 44.43 | 123.27 | 207.31 | ND | ND-87.6 |
| TNF-α | ND | ND | 35.28 | ND | 40.01 | 20.41 | ND | ND-140.0 |
| MCP-1 | 520.92 | 810.15 | 454.03 | 403.58 | 200.66 | 364.47 | 286.82 | 22.6-636.8 |
| IL-6 | 80.6 | 147.09 | 70.92 | 94.95 | 28.46 | 29.01 | 33.27 | ND-65.4 |
| IL-8 | 200.76 | 145.94 | 221.52 | 154.24 | 360.46 | 90.66 | 54.52 | ND-104.0 |
| IL-10 | 9.59 | 12 | 32.31 | 2.7 | 6.27 | 11.38 | ND | ND-18.6 |
| IL-12P70 | 3.09 | 3.7 | 9.31 | ND | 2.19 | 2.96 | ND | ND-17.8 |
| IL-17A | 110.54 | 113.62 | 205.85 | ND | 25.53 | ND | ND | ND-127.6 |
| IL-18 | 111.47 | 207.7 | 1021.36 | 1018.28 | 592.87 | 615.01 | 342.16 | 32-435.6 |
| IL-23 | 182.89 | 223.19 | 394.44 | ND | 28.21 | ND | ND | ND-188.2 |
| IL-33 | 43.23 | 46.75 | 189.26 | ND | ND | ND | ND | ND-294.3 |
